# Supplementary material for: Ectoine Globally Hypomethylates DNA in Skin Cells and Suppresses Cancer Proliferation
Source: Preprints.org preprint supplement (doi:10.20944/preprints202308.0461.v1), 2023-08-07

**Supplementary table 1:** Primers used in this study.

| **Gene Symbol** | **Forward Primer** | **Reverse Primer** |
| --- | --- | --- |
| *Dnmt1* | GCTACCAGTGCACCTTTGGT | *ATGATGGCCCTCCTTCGT* |
| *Dnmt3a* | ACACAGGGCCCGTTACTTCT | *TCACAGTGGATGCCAAAGG* |
| *Dnmt3b* | GCCTGCAAGACTTCTTCACTACT | *GGTACAACTTGGGTGGCTCA* |
| *Dnmt3l* | AACCGACGGAGCATTGAA | *CCGAGTGTACACCTGGAGAGT* |
| *Hdac1* | TGGTCTCTACCGAAAAATGGAG | *TCATCACTGTGGTACTTGGTCA* |
| *Hdac2* | TGCTGTTCATGAAGACAGTGG | *TTTGTCTGATGCTCGAATGG* |
| *Kdm3a* | TCTGGGATGGATTTGAAGATG | *AAACCTGGAAGGCATCATGT* |
| *Mettl3* | TAAACCACGGGAAGGAACAC | *TTATGACTGGTGGAACGAACC* |
| *Mettl14* | GCAGCACCTCGGTCATTTAT | *TCTTCTGTAACCCCACTTTCG* |
| *Igf2* | CGCTTCAGTTTGTCTGTTCG | *GCAGCACTCTTCCACGATG* |
| *Snrpn* | GACACCAAGAGGTGGTTAAAGC | *GGATGGGTCCTGTTTTCCTT* |
| *Mest* | GATAATGCGGCCATGGTG | *AGGTACGCAGCCAGCAAG* |


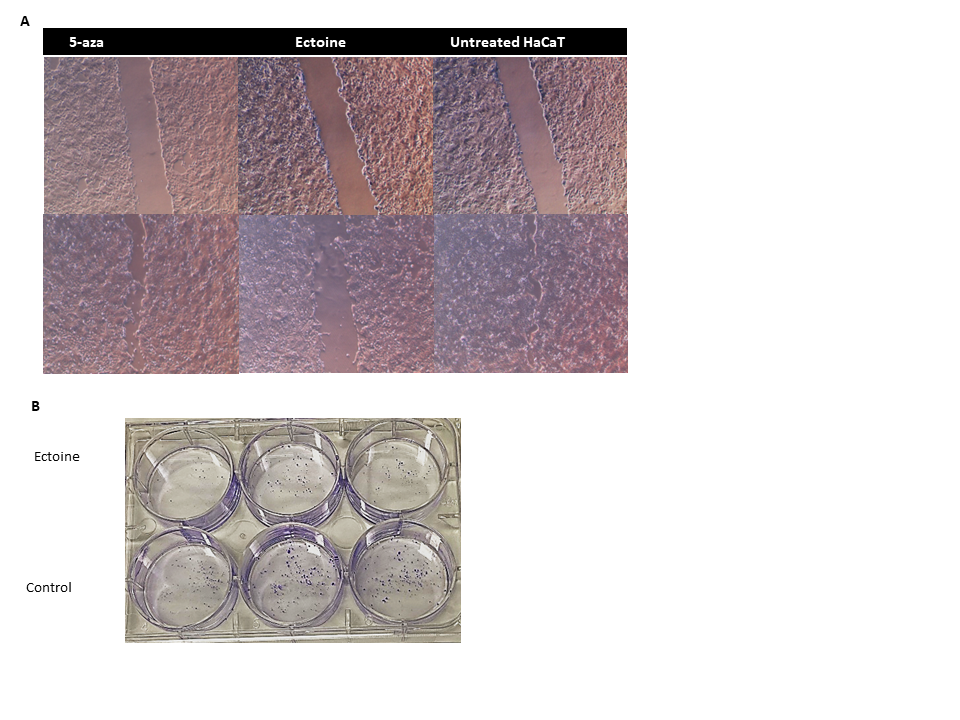

Supplement: Supplementary file 1 [file Supplemtary table.docx]
